# Supplementary material
Source: PubMed Central journal article supplement (PMC1150812)
Supplement: pnas_0409829102_1.pdf [file pnas_0409829102_1.pdf]

**Table1: Chemical structure, and formula, of compounds that exhibit a selective inhibition effect on splicing either  $\beta$ glob-3S or  $\beta$ glob-SRp55**

| N°                                                          | Structure | Formula             | N°                                                          | Structure | Formula                |
|-------------------------------------------------------------|-----------|---------------------|-------------------------------------------------------------|-----------|------------------------|
| Drugs inhibiting $\beta$ glob-3S but not $\beta$ glob-SRp55 |           |                     |                                                             |           |                        |
| C5                                                          |           | $C_{21}H_{25}N_5$   | C60                                                         |           | $C_{20}H_{22}N_4O$     |
| C6                                                          |           | $C_{23}H_{29}N_5$   | C68                                                         |           | $C_{23}H_{23}ClN_2O_3$ |
| C7                                                          |           | $C_{23}H_{28}N_4O$  | C72                                                         |           | $C_{24}H_{31}N_5O$     |
| C15                                                         |           | $C_{24}H_{29}N_3O$  | C74                                                         |           | $C_{21}H_{24}N_4O$     |
| C16                                                         |           | $C_{16}H_{12}ClN_3$ | C76                                                         |           | $C_{22}H_{27}N_5O_2$   |
| C20                                                         |           | $C_{21}H_{24}N_4O$  | C78                                                         |           | $C_{24}H_{30}N_4O_2$   |
| C24                                                         |           | $C_{22}H_{27}N_5$   | C79                                                         |           | $C_{15}H_{12}N_4$      |
| C30                                                         |           | $C_{24}H_{30}N_4O$  | C80                                                         |           | $C_{18}H_{13}N_3O$     |
| C38                                                         |           | $C_{21}H_{20}N_6$   | C81                                                         |           | $C_{24}H_{28}N_4O$     |
| C49                                                         |           | $C_{21}H_{24}N_4O$  | C82                                                         |           | $C_{22}H_{26}N_4$      |
| C50                                                         |           | $C_{25}H_{32}N_4O$  | C85                                                         |           | $C_{21}H_{25}N_5$      |
| C59                                                         |           | $C_{19}H_{20}N_4O$  | Drugs inhibiting $\beta$ glob-SRp55 but not $\beta$ glob-3S |           |                        |
| C22                                                         |           | $C_{24}H_{30}N_4O$  | C52                                                         |           | $C_{21}H_{24}N_4O$     |
| C37                                                         |           | $C_{27}H_{34}N_4O$  | C54                                                         |           | $C_{23}H_{28}N_4$      |
| C46                                                         |           | $C_{23}H_{28}N_4O$  | C70                                                         |           | $C_{23}H_{28}N_4O$     |
