# Supplementary material
Source: PubMed Central journal article supplement (PMC1150812)
Supplement: pnas_0409829102_2.pdf [file pnas_0409829102_2.pdf]

Table 1. showing indole derivatives scoring positive (inhibitors) and negative when tested on the inhibition of splicing of either  $\beta$ glo-3S or  $\beta$ glo-SRp55

| N°  | Structure                                                                           | Formula              | Splicing inhibition |           |
|-----|-------------------------------------------------------------------------------------|----------------------|---------------------|-----------|
|     |                                                                                     |                      | ESE-SF2             | ESE-SRP55 |
| C1  | 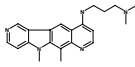   | $C_{21}H_{25}N_5$    | ++++                | ++++      |
| C2  |    | $C_{22}H_{27}N_5$    | ++++                | ++++      |
| C3  |    | $C_{23}H_{28}N_4O$   | ++++                | ++++      |
| C4  |    | $C_{25}H_{32}N_4O$   | ++++                | ++++      |
| C5  |    | $C_{21}H_{25}N_5$    | ++++                | ----      |
| C6  |    | $C_{23}H_{29}N_5$    | ++++                | ----      |
| C7  |    | $C_{23}H_{28}N_4O$   | ++++                | ----      |
| C8  |    | $C_{23}H_{28}N_4O$   | ++++                | ++++      |
| C9  |    | $C_{25}H_{30}N_4O_2$ | ++++                | ++++      |
| C10 |    | $C_{22}H_{26}N_4O$   | ++++                | ++++      |
| C11 |   | $C_{25}H_{32}N_4O$   | ++++                | ++++      |
| C12 |  | $C_{21}H_{25}N_5$    | ++++                | ++++      |
| C13 |  | $C_{24}H_{30}N_4O$   | ++++                | ++++      |
| C14 |  | $C_{20}H_{22}N_4O$   | ++++                | ++++      |
| C15 |  | $C_{24}H_{29}N_3O$   | ++++                | ----      |
| C16 |  | $C_{16}H_{12}ClN_3$  | ++                  | ----      |
| C17 |  | $C_{22}H_{26}N_4O$   | ++++                | ++++      |
| C18 |  | $C_{23}H_{28}N_4O$   | ++++                | ++++      |
| C19 |  | $C_{21}H_{24}N_4O$   | ++++                | ++++      |
| C20 |  | $C_{21}H_{24}N_4O$   | ++++                | ----      |
| C21 |  | $C_{21}H_{25}N_5$    | ++++                | ++++      |

| N°  | Structure                                                                           | Formula              | Splicing inhibition |           |
|-----|-------------------------------------------------------------------------------------|----------------------|---------------------|-----------|
|     |                                                                                     |                      | ESE-SF2             | ESE-SRP55 |
| C22 |    | $C_{24}H_{30}N_4O$   | - - - -             | + + + +   |
| C23 |    | $C_{26}H_{33}N_5O_2$ | + + + +             | + + + +   |
| C24 |    | $C_{22}H_{27}N_5$    | + + + +             | - - - -   |
| C25 |    | $C_{25}H_{32}N_4O$   | + + + +             | + + + +   |
| C26 |    | $C_{30}H_{36}N_4O$   | + + + +             | + + + +   |
| C27 |    | $C_{18}H_{15}N_3O_2$ | + + + +             | + + + +   |
| C28 |    | $C_{27}H_{33}N_5O_2$ | + + + +             | + + + +   |
| C29 |    | $C_{22}H_{27}N_5$    | + + + +             | + + + +   |
| C30 |    | $C_{24}H_{30}N_4O$   | + + + +             | - - - -   |
| C31 |   | $C_{20}H_{23}N_5$    | + + + +             | + + + +   |
| C32 |  | $C_{23}H_{26}N_4O$   | + + + +             | + + + +   |
| C33 |  | $C_{20}H_{21}N_3O_3$ | + + + +             | + + + +   |
| C34 |  | $C_{20}H_{23}N_5$    | + + + +             | + + + +   |
| C35 |  | $C_{41}H_{43}N_6O_2$ | + + + +             | + + + +   |
| C36 |  | $C_{27}H_{36}N_6$    | + + + +             | + + + +   |
| C37 |  | $C_{27}H_{34}N_4O$   | - - - -             | + + + +   |
| C38 |  | $C_{21}H_{20}N_6$    | + + + +             | - - - -   |
| C39 |  | $C_{22}H_{26}N_4$    | + + + +             | + + + +   |
| C40 |  | $C_{25}H_{32}N_4O$   | + + + +             | + + + +   |
| C41 |  | $C_{25}H_{32}N_4O_2$ | + + + +             | + + + +   |
| C42 |  | $C_{24}H_{30}N_4O$   | + + + +             | + + + +   |

| N°  | Structure                                                                           | Formula            | Splicing inhibition |           |
|-----|-------------------------------------------------------------------------------------|--------------------|---------------------|-----------|
|     |                                                                                     |                    | ESE-SF2             | ESE-SRP55 |
| C43 | 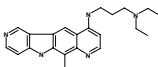   | $C_{22}H_{27}N_5$  | ++++                | ++++      |
| C44 |    | $C_{25}H_{32}N_4O$ | ++++                | ++++      |
| C45 |    | $C_{20}H_{23}N_5$  | ++++                | ++++      |
| C46 |    | $C_{23}H_{28}N_4O$ | ----                | ++        |
| C47 |    | $C_{22}H_{26}N_4O$ | ++++                | ++        |
| C48 |    | $C_{24}H_{30}N_4O$ | ++                  | ----      |
| C49 |    | $C_{21}H_{24}N_4O$ | ++++                | ----      |
| C50 |    | $C_{25}H_{32}N_4O$ | +++                 | ---       |
| C51 |    | $C_{22}H_{26}N_4O$ | +/-                 | +/-       |
| C52 |    | $C_{21}H_{24}N_4O$ | ----                | +++       |
| C53 |   | $C_{24}H_{30}N_4O$ | ++++                | ++++      |
| C54 |  | $C_{23}H_{28}N_4$  | ----                | ++++      |
| C55 |  | $C_{17}H_{15}N_3O$ | ++                  | ----      |
| C56 |  | $C_{24}H_{30}N_4O$ | ++++                | ++++      |
| C57 |  | $C_{22}H_{26}N_4O$ | ++++                | --        |
| C58 |  | $C_{20}H_{22}N_4O$ | ++++                | ++++      |
| C59 |  | $C_{19}H_{20}N_4O$ | ++++                | ----      |
| C60 |  | $C_{20}H_{22}N_4O$ | ++++                | ----      |
| C61 |  | $C_{22}H_{26}N_4O$ | ++                  | ----      |
| C62 |  | $C_{21}H_{24}N_4O$ | +/-                 | ++++      |
| C67 |  | $C_{22}H_{26}N_4O$ | ++++                | ++++      |

| N°  | Structure                                                                           | Formula                | Splicing inhibition |           |
|-----|-------------------------------------------------------------------------------------|------------------------|---------------------|-----------|
|     |                                                                                     |                        | ESE-SF2             | ESE-SRP55 |
| C68 | 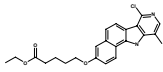   | $C_{23}H_{23}ClN_2O_3$ | ++++                | ----      |
| C69 |    | $C_{27}H_{38}N_6O$     | ++++                | ++++      |
| C70 |    | $C_{23}H_{28}N_4O$     | +/--                | ++++      |
| C71 |    | $C_{23}H_{29}N_5O$     | ++++                | ++++      |
| C72 |    | $C_{24}H_{31}N_5O$     | ++++                | ----      |
| C73 |    | $C_{23}H_{29}N_5O$     | ++++                | ++        |
| C74 |    | $C_{21}H_{24}N_4O$     | ++++                | ----      |
| C75 |    | $C_{20}H_{22}N_4O$     | ++++                | ++++      |
| C76 |    | $C_{22}H_{27}N_5O_2$   | ++++                | ----      |
| C77 |    | $C_{22}H_{26}N_4O$     | ----                | ----      |
| C78 |  | $C_{24}H_{30}N_4O_2$   | ++++                | ----      |
| C79 |  | $C_{15}H_{12}N_4$      | ++++                | ----      |
| C80 |  | $C_{18}H_{13}N_3O$     | ++++                | ----      |
| C81 |  | $C_{24}H_{28}N_4O$     | ++++                | ----      |
| C82 |  | $C_{22}H_{26}N_4$      | ++++                | ----      |
| C83 |  | $C_{17}H_{16}N_2O$     | ----                | ----      |
| C84 |  | $C_{17}H_{13}ClN_2O$   | ----                | ----      |
| C85 |  | $C_{21}H_{25}N_5$      | ++++                | ----      |
