# Supplementary material
Source: PubMed Central journal article supplement (PMC1150812)

Ctl D C5 C6 C7 C16 C20

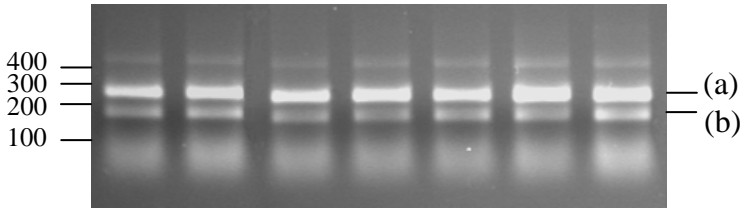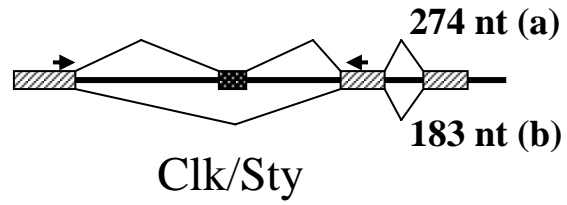

Ctl D C5 C6 C7 C16 C20

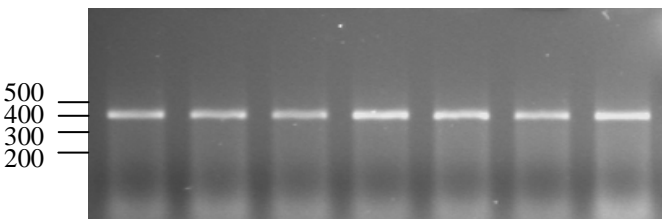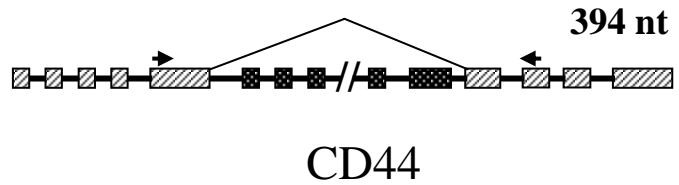

Ctl D C5 C6 C7 C16 C20

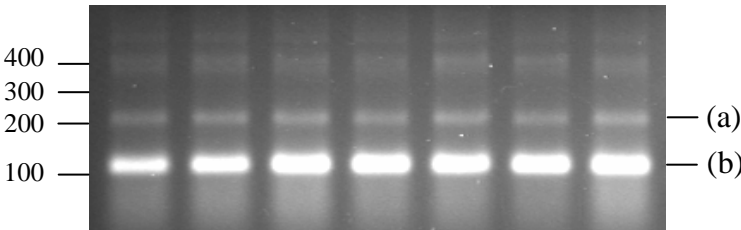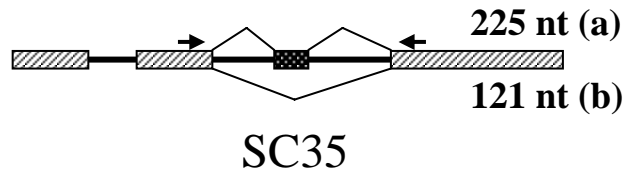

Ctl D C5 C6 C7 C16 C20

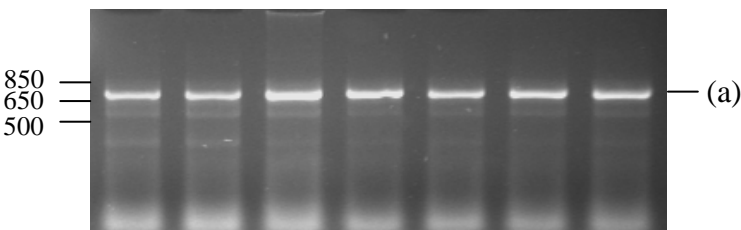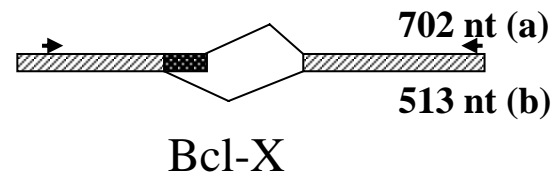

GAPDH

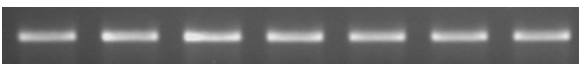

Supplement: pnas_0409829102_3.pdf [file pnas_0409829102_3.pdf]
